# Supplementary material for: Accuracy Maximization Analysis for Sensory-Perceptual Tasks: Computational Improvements, Filter Robustness, and Coding Advantages for Scaled Additive Noise
Source: PubMed Central journal article supplement (PMC5298250; doi:10.1371/journal.pcbi.1005281), 2017-02-08
Supplement: pcbi.1005281.s010.pdf [file pcbi.1005281.s010.pdf]

### S7 Text: Rotating correlated filters within the spanned subspace

Here, we derive the expressions for the weighted linear combinations that rotate two, arbitrary vectors within the subspace that they span. These linear combinations preserve filter length and correlation (i.e. cosine similarity)

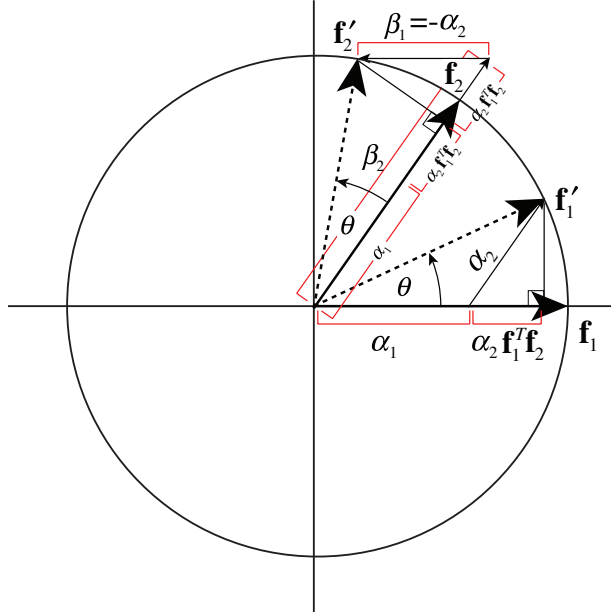

Any two  $N$ -dimensional unit vectors,  $\mathbf{f}_1$  and  $\mathbf{f}_2$ , define a two-dimensional subspace in  $\mathbb{R}^N$  assuming that  $\mathbf{f}_2 \neq \pm\mathbf{f}_1$ . The weighted linear combination that rotates the vectors by angle  $\theta$  while preserving length and filter correlation  $\rho = \mathbf{f}_2^T \mathbf{f}_1 = \mathbf{f}_2'^T \mathbf{f}_1'$  is given by

$$\mathbf{f}_1' = \alpha_1 \mathbf{f}_1 + \alpha_2 \mathbf{f}_2 \quad (\text{S26a})$$

$$\mathbf{f}_2' = \beta_1 \mathbf{f}_1 + \beta_2 \mathbf{f}_2 \quad (\text{S26b})$$

To determine the weights, consider the triangle formed by the origin,  $\mathbf{f}_1$  and  $\mathbf{f}_1'$ . By assumption, the hypotenuse has length 1.0. The rotation angle  $\theta$  is related to weights  $\alpha_1$  and  $\alpha_2$  by the trigonometric equations relating  $\sin(\cdot)$  and  $\cos(\cdot)$  to the opposite and adjacent sides of the unit right triangle

$$\sin \theta = \sqrt{\alpha_2^2 - \alpha_2^2 \rho^2} \quad (\text{S27a})$$

$$\cos \theta = \alpha_1 + \alpha_2 \rho \quad (\text{S27b})$$

Rearranging equation S27a yields the expression for  $\alpha_2$  in terms of  $\theta$  and  $\rho$

$$\alpha_2 = \frac{\sin \theta}{\sqrt{1 - \rho^2}} \quad (\text{S28})$$

Plugging equation S28 into equation S27b expresses  $\alpha_1$  in terms of  $\theta$  and  $\rho$

$$\alpha_1 = \cos \theta - \frac{\sin \theta}{\sqrt{1 - \rho^2}} \rho \quad (\text{S29})$$

The weights  $\beta$  can be expressed in terms of the weights  $\alpha$  by observing the similarity of the triangles formed by the origin,  $\mathbf{f}_1$ , and  $\mathbf{f}'_1$ , and the origin,  $\mathbf{f}_2$ , and  $\mathbf{f}'_2$

$$\beta_1 = -\alpha_2 \quad (\text{S30a})$$

$$\beta_2 = \alpha_1 + 2\alpha_2\rho \quad (\text{S30b})$$

Representing in matrix form

$$\begin{bmatrix} | & | \\ \mathbf{f}'_1 & \mathbf{f}'_2 \\ | & | \end{bmatrix} = \begin{bmatrix} | & | \\ \mathbf{f}_1 & \mathbf{f}_2 \\ | & | \end{bmatrix} \begin{bmatrix} \alpha_1 & -\alpha_2 \\ \alpha_2 & \alpha_1 + 2\alpha_2\rho \end{bmatrix} \quad (\text{S31})$$

Equations S28-31 specify the length and angle preserving linear transformations that rotate an arbitrary pair of unit vectors by angle  $\theta$  within the subspace that they span.
