# Supplementary material for: Accuracy Maximization Analysis for Sensory-Perceptual Tasks: Computational Improvements, Filter Robustness, and Coding Advantages for Scaled Additive Noise
Source: PLOS journal article supplement (doi:10.1371/journal.pcbi.1005281), 2017-02-08
Supplement: S1 (10.1371/journal.pcbi.1005281.s001) [file journal.pcbi.1005281.s001]

## Supporting Information

### Accuracy Maximization Analysis for Sensory-Perceptual Tasks: Computational Improvements, Filter Robustness, and Coding Advantages for Scaled Additive Noise

Johannes Burge<sup>1,2</sup> & Priyank Jaini<sup>1,3</sup>

<sup>1</sup> Department of Psychology, University of Pennsylvania, USA

<sup>2</sup> Neuroscience Graduate Group, University of Pennsylvania, USA

<sup>3</sup> David R. Cheriton School of Computer Science, University of Waterloo, Canada

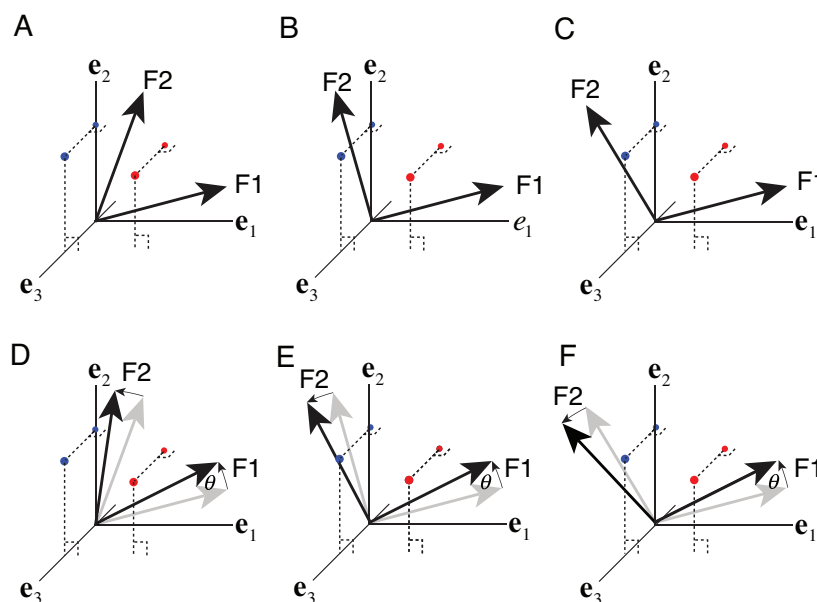

**Figure S1.** Stimulus encoding and uniqueness without filter response noise. The stimuli are represented as points in a three dimensional space (one stimulus from each of two levels of the latent variable, red and blue). The stimuli are projected into a standard basis spanned by two filters. Red Gaussian bumps represent individual filter encoding uncertainty for filter  $F_1$  and  $F_2$  to the red stimulus. When encoding is noiseless, encoding fidelity is invariant under changes in filter correlation (**A-C**) or filter rotation (**E-F**). Thus,  $F_1$  and  $F_2$  provide identical encoding regardless of whether they are orthogonal or not, and whether they are rotated are not.
