# Supplementary material for: Accuracy Maximization Analysis for Sensory-Perceptual Tasks: Computational Improvements, Filter Robustness, and Coding Advantages for Scaled Additive Noise
Source: PLOS journal article supplement (doi:10.1371/journal.pcbi.1005281), 2017-02-08
Supplement: S7 (10.1371/journal.pcbi.1005281.s007) [file journal.pcbi.1005281.s007]

**S4 Text: Optimal estimator for 0,1 cost function is MAP estimator**

The cost function associated with the L0 norm is given by

$$\gamma(\hat{X}, X) = E\left[(\hat{X} - X)^0\right]$$

$$\gamma(\hat{X}, X) = \sum_X (\hat{X} - X)^0 p(X)$$

Splitting the summation for all  $\hat{X}$  that do and do not equal  $X$

$$\gamma(\hat{X}, X) = \sum_{X_k = \hat{X}} 0 p(X_k) + \sum_{\forall X \neq \hat{X}} p(X)$$

The first term disappears and the second term can be rewritten

$$\gamma(\hat{X}, X) = 1 - p(X_k)$$

The value of  $\hat{X}$  that corresponds to the maximally probable  $X$  minimizes the cost.

$$\hat{X}^{opt} = \arg \max_X p(X) \quad (\text{S23})$$

Thus, for the 0,1 cost function, the maximum a posteriori (MAP) estimator is the optimal estimator.
